# Supplementary material for: Nephrotoxic Exposures and Acute Kidney Injury in Noncritically Ill Children Stratified by Service
Source: Oxford University Press journal article supplement (doi:10.1542/hpeds.2021-006169), 2022-09-14
Supplement: hpeds.2021-006169supplementarydata.pdf [file hpeds.2021-006169supplementarydata.pdf]

## Supplemental Information

**SUPPLEMENTAL TABLE 4** Estimated Creatinine Clearance (mL/min) in Neonates, Children, and Young Adults

| Age                | Estimated CrCl in mL/min |
|--------------------|--------------------------|
| 0 to <2 wk (term)  | 40.6                     |
| 2 wk to ≤8 wk      | 65.8                     |
| >8 wk to <2 y      | 95.7                     |
| 2 to <13 y         | 133                      |
| ≥13–21 y (males)   | 140                      |
| ≥13–21 y (females) | 126                      |

Reference creatinine clearance estimates from Schwartz et al. CrCl, creatinine clearance.

**SUPPLEMENTAL TABLE 5** Study Measure Definitions

| Measure Name                                               | Numerator                                                       | Denominator                                                                                                                        | Clinical Meaning                                                                          |
|------------------------------------------------------------|-----------------------------------------------------------------|------------------------------------------------------------------------------------------------------------------------------------|-------------------------------------------------------------------------------------------|
| Outcome metric                                             |                                                                 |                                                                                                                                    |                                                                                           |
| High NTMx exposure prevalence rate (per 1000 patient-days) | Number of patients with high NTMx exposure                      | The total number of patient hospital days for all hospitalized patients during the study period standardized per 1000 patient days | This measure generates a normalized rate of high NTMx exposure cases                      |
| AKI prevalence rate (per 1000 patient-days)                | Number of patients with high NTMx exposure who developed AKI    | The total number of patient hospital days for all hospitalized patients during the study period standardized per 1000 patient days | This measure generates a normalized rate of AKI                                           |
| Rate of NTMx-AKI in exposed (%)                            | Number of NTMx-AKI episodes in patients with high NTMx exposure | The total number of patients with high NTMx exposure                                                                               | This measure generates the percentage of patients with high NTMx exposure who develop AKI |
| Process metric                                             |                                                                 |                                                                                                                                    |                                                                                           |
| Serum creatinine (SCr) compliance (%)                      | Number of SCr values obtained                                   | The total number of NTMx exposure days                                                                                             | This measure generates the fraction of goal SCr values obtained per NINJA protocol        |

NTMx (nephrotoxic medication), AKI (acute kidney injury), NTMx-AKI (nephrotoxic medication-associated acute kidney injury), SCr (serum creatinine), NINJA (Nephrotoxic Injury Negated by Just in Time Action).

**SUPPLEMENTAL TABLE 6** Classification of Nephrotoxic Medication Exposure Between Service Lines

| Service                                       | 3 or More Nephrotoxins ( <i>n</i> = 448) |                                           |                                                  | 3 or More d of Vancomycin ( <i>n</i> = 116) |                                           |                                                  | 3 or More d of Aminoglycosides ( <i>n</i> = 45) |                                           |                                                  |
|-----------------------------------------------|------------------------------------------|-------------------------------------------|--------------------------------------------------|---------------------------------------------|-------------------------------------------|--------------------------------------------------|-------------------------------------------------|-------------------------------------------|--------------------------------------------------|
|                                               | <i>n</i>                                 | Percentage Within Service Line: %: 95% CI | Percentage Within NTMx Exposure Group: %: 95% CI | <i>n</i>                                    | Percentage Within Service Line: %: 95% CI | Percentage Within NTMx Exposure Group: %: 95% CI | <i>n</i>                                        | Percentage Within Service Line: %: 95% CI | Percentage Within NTMx Exposure Group: %: 95% CI |
| Hospital medicine ( <i>n</i> = 254)           | 211                                      | 83: 78–87                                 | 47: 42–52                                        | 42                                          | 17: 12–22                                 | 36: 27–46                                        | 1                                               | 0: 0–2                                    | 2: 0–12                                          |
| Neurology or psychiatry ( <i>n</i> = 9)       | 8                                        | 89: 52–100                                | 2: 1–3                                           | 0                                           | 0: 0–34                                   | 0: 0–3                                           | 1                                               | 11: 0–48                                  | 2: 0–12                                          |
| Gastroenterology ( <i>n</i> = 61)             | 29                                       | 48: 35–61                                 | 6: 4–9                                           | 31                                          | 51: 38–64                                 | 27: 19–36                                        | 1                                               | 2: 0–9                                    | 2: 0–12                                          |
| Liver ( <i>n</i> = 77)                        | 75                                       | 97: 91–100                                | 17: 13–21                                        | 2                                           | 3: 0–9                                    | 2: 0–6                                           | 0                                               | 0: 0–5                                    | 0: 0–8                                           |
| Pediatric surgery ( <i>n</i> = 37)            | 33                                       | 89: 75–97                                 | 7: 5–10                                          | 4                                           | 11: 3–25                                  | 3: 1–9                                           | 0                                               | 0: 0–9                                    | 0: 0–8                                           |
| Trauma or acute care surgery ( <i>n</i> = 27) | 23                                       | 85: 66–96                                 | 5: 3–8                                           | 3                                           | 11: 2–29                                  | 3: 1–7                                           | 1                                               | 4: 0–19                                   | 2: 0–12                                          |
| Neurosurgery ( <i>n</i> = 66)                 | 48                                       | 73: 60–83                                 | 11: 8–14                                         | 18                                          | 27: 17–40                                 | 16: 9–23                                         | 0                                               | 0: 0–5                                    | 0: 0–8                                           |
| Rehabilitation ( <i>n</i> = 15)               | 11                                       | 73: 45–92                                 | 2: 1–4                                           | 4                                           | 27: 8–55                                  | 3: 1–9                                           | 0                                               | 0: 0–22                                   | 0: 0–8                                           |
| Pulmonology ( <i>n</i> = 63)                  | 10                                       | 16: 8–27                                  | 2: 1–4                                           | 12                                          | 19: 10–31                                 | 10: 5–17                                         | 41                                              | 65: 52–77                                 | 91: 79–98                                        |
| Total ( <i>n</i> = 609)                       | 448                                      | 74: 70–77                                 | 100                                              | 116                                         | 19: 16–22                                 | 100                                              | 45                                              | 7: 5–10                                   | 100                                              |

This table lists the count and proportion of a given service line indicating the reason for the NTMx exposure and the proportion for each service line within a given NTMx exposure. The liver service included liver transplant patients and the pediatric surgery service included pediatric specialty surgery, plastic surgery, otolaryngology, and orthopedics.
